# Supplementary material
Source: PubMed Central journal article supplement (PMC5126363)
Supplement: JVI.01622-16_zjv999182156so1.pdf [file JVI.01622-16_zjv999182156so1.pdf]

**Table S1. Composition of the defined modules.****Module 1**

|                             |                             |
|-----------------------------|-----------------------------|
| Halovirus HVTV-1 NC_020158' | 'Caudovirales/Siphoviridae' |
| Halovirus HCTV-5 NC_021327' | 'Caudovirales/Siphoviridae' |
| Halovirus HCTV-1 NC_021330' | 'Caudovirales/Siphoviridae' |

**Module 2**

|                                 |                           |
|---------------------------------|---------------------------|
| Halorubrum virus HF2 NC_003345' | 'Caudovirales/Myoviridae' |
| 'Halovirus HF1 NC_004927'       | 'Caudovirales/Myoviridae' |
| 'Halovirus HSTV-2 NC_020159'    | 'Caudovirales/Myoviridae' |
| 'Halovirus HRTV-5 NC_021320'    | 'Caudovirales/Myoviridae' |
| 'Halovirus HRTV-8 NC_021321'    | 'Caudovirales/Myoviridae' |
| 'Halovirus HGTV-1 NC_021328'    | 'Caudovirales/Myoviridae' |
| 'Halovirus HRTV-7 NC_021335'    | 'Caudovirales/Myoviridae' |

**Module 3**

|                                                    |                             |
|----------------------------------------------------|-----------------------------|
| Nitrososphaera Pro-Nvie1 FR725450'                 | 'Caudovirales/Proviruses'   |
| ANMV-1 virus KP703175'                             | 'metagenomics'              |
| Methanosarcina acetivorans C2A NC_003552'          | 'Caudovirales/Proviruses'   |
| 'Methanocaldococcus fervens AG86 NC_013156'        | 'Caudovirales/Proviruses'   |
| 'Methanocaldococcus jannaschii DSM 2661 NC_000909' | 'Caudovirales/Proviruses'   |
| 'Methanococcus maripaludis C6 NC_009975'           | 'Caudovirales/Proviruses'   |
| 'Methanothermococcus okinawensis IH1 NC_015636'    | 'Caudovirales/Proviruses'   |
| Methanobrevibacter smithii ATCC 35061 NC_009515'   | 'Caudovirales/Proviruses'   |
| 'Methanocaldococcus vulcanius M7 NC_013407'        | 'Caudovirales/Proviruses'   |
| Methanobacterium virus psiM2 NC_001902'            | 'Caudovirales/Siphoviridae' |
| Methanothermobacter virus psiM100 NC_002628'       | 'Caudovirales/Proviruses'   |
| Natrialba virus PhiCh1 NC_004084'                  | 'Caudovirales/Myoviridae'   |
| 'Archaeal BJ1 virus NC_008695'                     | 'Caudovirales/Siphoviridae' |
| 'Halovirus HCTV-2 NC_021319'                       | 'Caudovirales/Siphoviridae' |
| 'Halovirus HHTV-1 NC_021322'                       | 'Caudovirales/Siphoviridae' |
| 'Halovirus HRTV-4 NC_021329'                       | 'Caudovirales/Siphoviridae' |
| 'Halovirus HHTV-2 NC_021340'                       | 'Caudovirales/Siphoviridae' |
| Halovirus HSTV-1 NC_021471'                        | 'Caudovirales/Podoviridae'  |
| Halorubrum virus CGphi46 NC_021537'                | 'Caudovirales'              |

**Module 4**

|                                                     |                    |
|-----------------------------------------------------|--------------------|
| 'Sulfolobus islandicus filamentous virus NC_003214' | 'Lipothrixviridae' |
| 'Acidianus filamentous virus 6 NC_010152'           | 'Lipothrixviridae' |
| 'Acidianus filamentous virus 7 NC_010153'           | 'Lipothrixviridae' |
| 'Acidianus filamentous virus 8 NC_010154'           | 'Lipothrixviridae' |
| 'Acidianus filamentous virus 9 NC_010537'           | 'Lipothrixviridae' |
| 'Acidianus filamentous virus 2 NC_009884'           | 'Lipothrixviridae' |
| 'Acidianus filamentous virus 1 NC_005830'           | 'Lipothrixviridae' |
| 'Stygiolobus rod-shaped virus FM164764'             | 'Rudiviridae'      |
| 'Sulfolobales Mexican rudivirus 1 JX944686'         | 'Rudiviridae'      |
| 'Acidianus rod-shaped virus 2 KP282675'             | 'Rudiviridae'      |

'Sulfolobus islandicus rod-shaped virus 2 NC\_004086'  
'Sulfolobus islandicus rod-shaped virus 1 NC\_004087'  
'Acidianus rod-shaped virus 1 NC\_009965'

'Rudiviridae'  
'Rudiviridae'  
'Rudiviridae'

#### Module 5

'Acidianus bottle-shaped virus NC\_009452'  
Nitrosopumilus sp. AR NZ\_AJVJ01000035'  
'Candidatus Nitrosopumilus sp. AR2 NC\_018656'  
'Nitrosopumilus sp. SJ NZ\_AJVI01000008'  
His1 virus NC\_007914'  
'Acidianus bottle-shaped virus 3 NC\_028787'  
'Acidianus bottle-shaped virus 2 NC\_028938'

'Ampullaviridae'  
Casposons/Linked\_to\_Ampullaviridae\_Salterprovirus'  
Casposons/Linked\_to\_Ampullaviridae\_Salterprovirus'  
Casposons/Linked\_to\_Ampullaviridae\_Salterprovirus'  
Fuselloviridae/Salterprovirus'  
'Ampullaviridae'  
'Ampullaviridae'

#### Module 6

Haloarcula virus SH1 NC\_007217'  
'Haloarcula hispanica icosahedral virus 2 JN968479'  
'Halovirus PH1 KC252997'  
'Sulfolobus turreted icosahedral virus NC\_005892'  
'Sulfolobus turreted icosahedral virus 2 NC\_014099'  
Natrinema virus SNJ1 AY048850'  
'Thermus thermophilus phage IN93 NC\_004462'  
Haloarcula saccharovororum plasmid pZMX101 NC\_004531'  
'Thermus thermophilus bacteriophage P23-77 NC\_013197'  
Methanosarcina acetivorans plasmid pC2A NC\_002097'  
Methanococcus voltae A3 provirus MVV NC\_014222-2'  
Pyrobaculum oguniense TE7 plasmid NC\_016886'  
Thermococcus kodakarensis KOD1 provirus TKV4 NC\_006624'  
Thermococcus nautili plasmid pTN3 NC\_022527'

Sphaerolipoviridae/Alphashaerolipovirus'  
Sphaerolipoviridae/Alphashaerolipovirus'  
Sphaerolipoviridae/Alphashaerolipovirus'  
'Turriviridae'  
'Turriviridae'  
Sphaerolipoviridae/Betasphaerolipovirus'  
Sphaerolipoviridae/Gammasphaerolipovirus'  
Plasmids/Linked\_to\_Betasphaerolipovirus'  
Sphaerolipoviridae/Gammasphaerolipovirus'  
'Plasmids/Linked\_to\_Betasphaerolipovirus'  
Linked\_to\_Turriviridae/Proviruses'  
'Plasmids/Linked\_to\_Turriviridae'  
Linked\_to\_Turriviridae/Proviruses'  
'Plasmids/Linked\_to\_Turriviridae'

#### Module 7

Thermococcus sp. CIR10 plasmid pCIR10 NC\_019884'  
Thermococcus sp. IRI48 plasmid pIRI48 NC\_019883'  
Thermococcus nautili plasmid pTN2 NC\_014115'  
Methanococcus voltae A3 provirus A3-VLP NC\_014222-1'  
Pyrococcus abyssi virus 1 NC\_009597'

'Plasmids/Linked\_to\_PAV1'  
'Plasmids/Linked\_to\_PAV1'  
'Plasmids/Linked\_to\_PAV1'  
Linked\_to\_Fuselloviridae/Proviruses'  
'Fuselloviridae'

#### Module 8

'Sulfolobus virus 1 NC\_001338'  
'Sulfolobus virus 2 NC\_005265'  
'Sulfolobus virus Ragged Hills NC\_005360'  
'Sulfolobus virus Kamchatka 1 NC\_005361'  
'Sulfolobus spindle-shaped virus 4 NC\_009986'  
'Sulfolobus spindle-shaped virus 7 NC\_013588'  
'Acidianus spindle-shaped virus 1 NC\_013585'  
'Sulfolobus spindle-shaped virus 6 NC\_013587'  
'Aeropyrum pernix ovoid virus 1 HE580237'  
Sulfolobus islandicus plasmid pSSVx NC\_010011'

'Fuselloviridae'  
'Fuselloviridae'  
'Fuselloviridae'  
'Fuselloviridae'  
'Fuselloviridae'  
'Fuselloviridae'  
'Fuselloviridae'  
'Fuselloviridae'  
'Guttaviridae'  
'Plasmids/Linked\_to\_Fuselloviridae'

|                                                     |                                     |
|-----------------------------------------------------|-------------------------------------|
| Sulfolobus solfataricus P2 plasmid pSSVi NC_013777' | 'Plasmids/Linked_to_Fuselloviridae' |
| Aeropyrum pernix spindle-shaped virus 1 HE580238'   | 'Fuselloviridae'                    |
| Thermococcus prieurii virus 1 NC_016899'            | 'Fuselloviridae'                    |
| 'Sulfolobales Mexican fusellovirus 1 NC_020882'     | 'Fuselloviridae'                    |
| 'Sulfolobus islandicus L.S.2.15 CP001399'           | Fuselloviridae/Proviruses'          |
| 'Sulfolobus islandicus M.14.25 CP001400'            | Fuselloviridae/Proviruses'          |
| 'Sulfolobus islandicus Y.G.57.14 CP001403'          | Fuselloviridae/Proviruses'          |

#### Module 9

|                                                |                  |
|------------------------------------------------|------------------|
| 'Acidianus two-tailed virus NC_007409'         | 'Bicaudaviridae' |
| 'Sulfolobales virus YNP1 KP282679'             | 'metagenomics'   |
| 'Sulfolobales Virus YNP2 KP282680'             | 'metagenomics'   |
| 'Hyperthermophilic Archaeal Virus 2 NC_014321' | 'metagenomics'   |
| 'Sulfolobus monocaudavirus SMV1 HG322870'      | 'Bicaudaviridae' |
| 'Sulfolobus virus STSV1 NC_006268'             | 'Bicaudaviridae' |
| 'Sulfolobus virus STSV2 NC_020077'             | 'Bicaudaviridae' |
| 'Sulfolobus monocaudavirus SMV2 NC_029020'     | 'Bicaudaviridae' |
| 'Sulfolobus monocaudavirus SMV3 NC_029103'     | 'Bicaudaviridae' |
| 'Acidianus tailed spindle virus NC_029316'     | 'Bicaudaviridae' |

#### Module 10

|                                                        |                                      |
|--------------------------------------------------------|--------------------------------------|
| Haloarcula hispanica pleomorphic virus 2 KF056323'     | 'Pleolipoviridae'                    |
| Halorubrum pleomorphic virus 1 NC_012558'              | 'Pleolipoviridae'                    |
| 'Halorubrum pleomorphic virus 2 NC_017087'             | 'Pleolipoviridae'                    |
| 'Halorubrum pleomorphic virus 6 NC_017089'             | 'Pleolipoviridae'                    |
| Archaeoglobus profundus plasmid pGS5 NC_012890'        | 'Plasmids/Linked_to_Pleolipoviridae' |
| Natrinema virus SNJ2 CP003412'                         | 'Pleolipoviridae'                    |
| 'Halorubrum pleomorphic virus 3 NC_017088'             | 'Pleolipoviridae'                    |
| Halogeometricum pleomorphic virus 1 NC_017090'         | 'Pleolipoviridae'                    |
| 'His2 virus NC_007918'                                 | 'Pleolipoviridae'                    |
| Haloferax lucentense DSM 14919 plasmid pHK2 NC_019285' | Pleolipoviridae/Proviruses'          |
| Thermococcus prieurii plasmid pTP2 NC_021208'          | 'Plasmids/Linked_to_Pleolipoviridae' |

#### Unassigned

|                                                   |                    |
|---------------------------------------------------|--------------------|
| 'Pyrobaculum spherical virus NC_005872'           | 'Globuloviridae'   |
| 'Hyperthermophilic Archaeal Virus 1 NC_014322'    | 'metagenomics'     |
| 'Aeropyrum spring-shaped virus HE681887'          | 'Spiraviridae'     |
| 'Pyrobaculum filamentous virus 1 KU307456'        | 'Tristromaviridae' |
| 'Thermoproteus tenax virus 1 X14855'              | 'Tristromaviridae' |
| 'Thermoproteus tenax spherical virus 1 NC_006556' | 'Globuloviridae'   |
| 'Aeropyrum pernix bacilliform virus 1 AB537968'   | 'Clavaviridae'     |

**Table S2. Complete list of core genes.**

| Family Nr. | Representative sequence | Annotation                                                         | Retention | Abund. | Module | Hallmark | Signature* | Comments                                                                                                                                    |
|------------|-------------------------|--------------------------------------------------------------------|-----------|--------|--------|----------|------------|---------------------------------------------------------------------------------------------------------------------------------------------|
| 30578      | '448260172'             | ' RHH domain'                                                      | 0.740     | 0.310  | 8      |          |            | * Signature genes of module 5 (Ampullaviridae) are absent in related casposons                                                              |
| 24         | '506497871'             | Integrase                                                          | 0.516     | 0.236  | 3      |          |            |                                                                                                                                             |
| 5          | 'AAQ07582.1'            | Terminase                                                          | 0.960     | 0.234  | 3      |          |            |                                                                                                                                             |
| 16         | 'BAK52950.1'            | Portal protein                                                     | 0.631     | 0.217  | 3      |          |            |                                                                                                                                             |
| 13         | 'ABD90605.1'            | Major capsid protein HK97-like                                     | 0.834     | 0.208  | 3      |          |            |                                                                                                                                             |
| 11         | '738838588'             | DNA polymerase B                                                   | 0.323     | 0.188  | 5      |          |            | Core gene in the greater dsDNA virus network. It includes protein- and RNA-primed PolB. Protein-primed PolB is signature of Ampullaviridae. |
| 30596      | '448260216'             | DnaA-like AAA+ ATPase (PHA00729)                                   | 0.999     | 0.188  | 8      |          |            |                                                                                                                                             |
| 111        | 'NP_037700.1'           | Protease (herpesvirus S21, phage U9/U35)                           | 0.588     | 0.184  | 3      |          |            |                                                                                                                                             |
| 30580      | '146411830'             | Glycosyl transferase (GT-B superfamily)                            | 0.999     | 0.153  | 4      |          |            |                                                                                                                                             |
| 12         | '134287264'             | A32-like packaging ATPase (FtsK/HerA)                              | 0.999     | 0.144  | 6      |          |            |                                                                                                                                             |
| 26         | 'ADF29313.1'            | Phage mu protein F, putative minor head protein                    | 0.733     | 0.138  | 3      |          |            |                                                                                                                                             |
| 30576      | '472438248'             | Major capsid protein from fuselloviruses                           | 0.999     | 0.136  | 8      |          |            |                                                                                                                                             |
| 30577      | '472438234'             | ' integrase [Sulfolobales Mexican fusellovirus 1]'                 | 0.969     | 0.124  | 8      |          |            |                                                                                                                                             |
| 36714      | YP_007348292.1          | AAA family ATPase                                                  | 0.999     | 0.123  | 9      |          |            |                                                                                                                                             |
| 27         | '310831525'             | HNHc endonuclease Bacteriophage HK97-gp10, putative tail-component | 0.486     | 0.122  | 2      |          |            |                                                                                                                                             |
| 22         | 'NP_945289.1'           |                                                                    | 0.683     | 0.104  | 3      |          |            |                                                                                                                                             |
| 23         | '9964588'               | phage tail tape measure protein                                    | 0.163     | 0.098  | 3      |          |            | Core gene in the greater dsDNA virus network                                                                                                |
| 60         | 'YP_003929.1'           | ' Metallophosphatase'                                              | 0.770     | 0.098  | 2      |          |            |                                                                                                                                             |
| 1045       | 'YP_319903.1'           | Putative integrase                                                 | 0.999     | 0.092  | 9      |          |            |                                                                                                                                             |
| 30612      | '448260199'             | PHA02732 / hypothetical protein STSV2_52                           | 0.999     | 0.092  | 9      |          |            |                                                                                                                                             |
| 551        | 'NP_665939.1'           | ' HTH domain'                                                      | 0.333     | 0.092  | 2      |          |            | Core gene in the greater dsDNA virus network                                                                                                |
| 30623      | '448260185'             | hypothetical protein STSV2_38                                      | 0.999     | 0.081  | 9      |          |            |                                                                                                                                             |
| 30601      | '270281838'             | ' zinc finger protein [Sulfolobus spindle-shaped virus 7]'         | 0.624     | 0.081  | 8      |          |            |                                                                                                                                             |
| 30615      | YP_001542641.1          | MCP from Ligamenvirales                                            | 0.826     | 0.080  | 4      |          |            |                                                                                                                                             |
| 30595      | '171473698'             | Glycosyltransferase (PHA01631)                                     | 0.999     | 0.080  | 4      |          |            |                                                                                                                                             |
| 305        | 'CCE26327.1'            | MoxR-like ATPase                                                   | 0.663     | 0.075  | 9      |          |            |                                                                                                                                             |
| 68         | '738838596'             | Double jelly-roll major capsid prot                                | 0.999     | 0.072  | 6      |          |            |                                                                                                                                             |
| 30579      | '472438232'             | PHA00728 (coiled-coil protein)                                     | 0.999     | 0.071  | 8      |          |            |                                                                                                                                             |
| 26445      | 'YP_002791886.1'        | Rolling-circle replication initiation endonuclease                 | 0.063     | 0.071  | 10     |          |            | Added to avoid disconnection of 'Archaeoglobus profundus NC_012890'                                                                         |
| 30581      | '171473709'             | SAM-dependent methyltransferase                                    | 0.794     | 0.070  | 4      |          |            |                                                                                                                                             |
| 26471      | 'YP_919083.1'           | 'GI:119757041'                                                     | 0.999     | 0.067  | 3      |          |            |                                                                                                                                             |
| 69         | 'CBJ93956.1'            | ' PDDEXK nuclease; Cas4 superfamily'                               | 0.999     | 0.066  | 2      |          |            |                                                                                                                                             |
| 6697       | YP_001429672.1'         | ' primase'                                                         | 0.999     | 0.066  | 2      |          |            |                                                                                                                                             |
| 19         | '9628153'               | ' Ribonucleotide reductase large subunit'                          | 0.063     | 0.064  | 2      |          |            | Core gene in the greater dsDNA virus network                                                                                                |
| 30641      | '448260178'             | ' hypothetical protein STSV2_31 [Sulfolobus virus STSV2]'          | 0.999     | 0.064  | 9      |          |            |                                                                                                                                             |
| 30649      | '448260196'             | ' hypothetical protein STSV2_49 [Sulfolobus virus STSV2]'          | 0.999     | 0.064  | 9      |          |            |                                                                                                                                             |
| 30696      | '448260184'             | Major capsid protein from Bicaudaviridae                           | 0.999     | 0.064  | 9      |          |            |                                                                                                                                             |
| 44         | 'BAK52969.1'            | Baseplate J family protein                                         | 0.643     | 0.064  | 2      |          |            |                                                                                                                                             |
| 19348      | 'NP_665955.1'           | 'GI:22091141'                                                      | 0.643     | 0.064  | 2      |          |            |                                                                                                                                             |

|       |                  |                                                                                                                                                                                 |       |       |    |                                                                                       |
|-------|------------------|---------------------------------------------------------------------------------------------------------------------------------------------------------------------------------|-------|-------|----|---------------------------------------------------------------------------------------|
| 30913 | '75750417'       | 'GI:75750417'                                                                                                                                                                   | 0.755 | 0.063 | 9  |                                                                                       |
| 30574 | '472438231'      | 'hypothetical protein SMF1_0006 [Sulfolobales Mexican fusellovirus 1]'                                                                                                          | 0.999 | 0.061 | 8  |                                                                                       |
| 30575 | '472438243'      | 'putative end-filament protein [Sulfolobales Mexican fusellovirus 1]'                                                                                                           | 0.999 | 0.061 | 8  |                                                                                       |
| 30587 | '472438245'      | 'hypothetical protein SMF1_0020 [Sulfolobales Mexican fusellovirus 1]'                                                                                                          | 0.999 | 0.061 | 8  |                                                                                       |
| 30602 | '472438229'      | 'hypothetical protein SMF1_0004 [Sulfolobales Mexican fusellovirus 1]'                                                                                                          | 0.999 | 0.061 | 8  |                                                                                       |
| 34324 | '27819355'       | 'GI:27819355'                                                                                                                                                                   | 0.999 | 0.060 | 6  |                                                                                       |
| 34325 | '27819354'       | 'GI:27819354'                                                                                                                                                                   | 0.999 | 0.060 | 6  |                                                                                       |
| 30907 | '75750431'       | 'GI:75750431'                                                                                                                                                                   | 0.486 | 0.060 | 9  |                                                                                       |
| 30585 | '171473711'      | 'hypothetical protein AFV9_gp63 [Acidianus filamentous virus 9]'                                                                                                                | 0.343 | 0.060 | 4  |                                                                                       |
| 30712 | '171473720'      | 'hypothetical protein AFV9_gp72 [Acidianus filamentous virus 9]'                                                                                                                | 0.343 | 0.060 | 4  |                                                                                       |
| 31178 | 90403542'        | ATP-dependent metalloprotease FtsH                                                                                                                                              | 0.999 | 0.059 | 10 |    |
| 31182 | 90403538'        | Spike protein (HRPV-1 VP4)                                                                                                                                                      | 0.999 | 0.059 | 10 |    |
| 30592 | '270281809'      | 'hypothetical protein SSSV6_gp25 [Sulfolobus spindle-shaped virus 6]'                                                                                                           | 0.624 | 0.058 | 8  |                                                                                       |
| 30598 | '472438246'      | 'putative transcriptional regulator [Sulfolobales Mexican fusellovirus 1]'                                                                                                      | 0.631 | 0.055 | 8  |                                                                                       |
| 30606 | '472438230'      | 'hypothetical protein SMF1_0005 [Sulfolobales Mexican fusellovirus 1]'                                                                                                          | 0.631 | 0.055 | 8  |                                                                                       |
| 8     | '134287171'      | 'DEAD-like helicase'                                                                                                                                                            | 0.168 | 0.055 | 4  | Core gene in the greater dsDNA virus network                                          |
| 30590 | '157929288'      | 'hypothetical protein AFV2_gp15 [Acidianus filamentous virus 2]'                                                                                                                | 0.778 | 0.054 | 4  |                                                                                       |
| 30653 | '448260181'      | 'GI:448260181'                                                                                                                                                                  | 0.444 | 0.054 | 9  |                                                                                       |
| 30616 | '700075124'      | 'hypothetical protein [Stygiolobus rod-shaped virus]'                                                                                                                           | 0.999 | 0.054 | 4  |                                                                                       |
| 50    | '116326771'      | Polynucleotide kinase/phosphatase                                                                                                                                               | 0.033 | 0.052 | 7  | Core gene in the greater dsDNA virus network                                          |
| 34475 | 'AHF22118.1'     | uncharacterized, GI:571033270                                                                                                                                                   | 0.571 | 0.052 | 10 |   |
| 34492 | 'YP_002791888.1' | Pleolipovirus integral membrane protein                                                                                                                                         | 0.571 | 0.052 | 10 |  |
| 35205 | 'SNJ1_gp15'      | 'missing_db_xref_qualifer'                                                                                                                                                      | 0.999 | 0.051 | 6  |                                                                                       |
| 271   | '9628234'        | 'proliferating cell nuclear antigen'                                                                                                                                            | 0.087 | 0.051 | 3  | Core gene in the greater dsDNA virus network                                          |
| 34677 | 'NP_542589.1'    | 'GI:18138485'                                                                                                                                                                   | 0.999 | 0.051 | 2  |  |
| 34687 | 'NP_542607.1'    | COG5484, YjcR                                                                                                                                                                   | 0.999 | 0.051 | 2  |  |
| 32051 | '937424876'      | '38K [Perigonia lusca single nucleopolyhedrovirus]'                                                                                                                             | 0.200 | 0.050 | 7  | Core gene in the greater dsDNA virus network                                          |
| 545   | 'BAK52970.1'     | 'hypothetical protein'                                                                                                                                                          | 0.643 | 0.050 | 2  |                                                                                       |
| 30608 | '270281824'      | 'hypothetical protein SSSV7_gp02 [Sulfolobus spindle-shaped virus 7]'                                                                                                           | 0.208 | 0.049 | 8  | Core gene in the greater dsDNA virus network                                          |
| 34839 | 'YP_007379058.1' | 'GI:443404719'                                                                                                                                                                  | 0.999 | 0.048 | 1  |                                                                                       |
| 34655 | 'NP_542552.1'    | 'GI:18138450'                                                                                                                                                                   | 0.843 | 0.046 | 2  |                                                                                       |
| 34333 | '478755957'      | 'hypothetical protein HhPH1_gp09 [Haloarcula hispanica virus PH1]'                                                                                                              | 0.999 | 0.045 | 6  |                                                                                       |
| 22541 | 'YP_003358951.1' | 'hypothetical protein'                                                                                                                                                          | 0.999 | 0.044 | 4  |                                                                                       |
| 30589 | '171473670'      | 'hypothetical protein AFV9_gp22 [Acidianus filamentous virus 9]'                                                                                                                | 0.999 | 0.044 | 4  |                                                                                       |
| 30628 | '171473671'      | 'hypothetical protein AFV9_gp23 [Acidianus filamentous virus 9]'                                                                                                                | 0.999 | 0.044 | 4  |                                                                                       |
| 30680 | '171473690'      | 'hypothetical protein AFV9_gp42 [Acidianus filamentous virus 9]'                                                                                                                | 0.999 | 0.044 | 4  |                                                                                       |
| 186   | '441432820'      | 'nucleotidase'                                                                                                                                                                  | 0.999 | 0.043 | 1  |                                                                                       |
| 273   | '701447244'      | 'conserved ribonuclease H [Melbournevirus]'                                                                                                                                     | 0.999 | 0.043 | 1  |                                                                                       |
| 544   | 'ADQ52777.1'     | '''' conserved hypothetical protein, range: 1..178 HHsearch against CDD matches: PRK04860:hypothetical protein;; PRK04351:hypothetic...' <Preview truncated at 128 characters>' | 0.999 | 0.043 | 1  |                                                                                       |
| 34814 | 'YP_007379023.1' | 'GI:443404684'                                                                                                                                                                  | 0.999 | 0.043 | 1  |                                                                                       |
| 35182 | 'YP_007195308.1' | Putative primase/polymerase                                                                                                                                                     | 0.999 | 0.043 | 7  |  |
| 35183 | 'YP_007195311.1' | Coiled-coil domain protein                                                                                                                                                      | 0.999 | 0.041 | 7  |  |
| 2376  | 'ADE87958.1'     | 'putative replicative DNA helicase'                                                                                                                                             | 0.559 | 0.040 | 3  |                                                                                       |

|       |                  |                                                                                        |       |       |   |
|-------|------------------|----------------------------------------------------------------------------------------|-------|-------|---|
| 34554 | 'YP_003128847.1' | 'GI:256811478'                                                                         | 0.559 | 0.040 | 3 |
| 34574 | 'YP_003128884.1' | 'GI:256811515'                                                                         | 0.559 | 0.040 | 3 |
| 496   | '134287225'      | 'transcription initiation factor IIB'                                                  | 0.001 | 0.039 | 9 |
| 15    | '134287325'      | 'S_TKc serine/threonine protein kinase'                                                | 0.015 | 0.039 | 1 |
| 3887  | 'ALM_ORF07'      | 'ALM_ORF07'                                                                            | 0.999 | 0.038 | 5 |
| 30837 | '146411859'      | GI:146411859'                                                                          | 0.999 | 0.038 | 5 |
| 30839 | '146411857'      | GI:146411857'                                                                          | 0.999 | 0.038 | 5 |
| 30840 | '146411856'      | GI:146411856'                                                                          | 0.999 | 0.038 | 5 |
| 30841 | '146411854'      | GI:146411854'                                                                          | 0.999 | 0.038 | 5 |
| 30842 | '146411853'      | GI:146411853'                                                                          | 0.999 | 0.038 | 5 |
| 30843 | '146411852'      | GI:146411852'                                                                          | 0.999 | 0.038 | 5 |
| 30844 | '146411851'      | GI:146411851'                                                                          | 0.999 | 0.038 | 5 |
| 30845 | '146411850'      | GI:146411850'                                                                          | 0.999 | 0.038 | 5 |
| 30846 | '146411848'      | GI:146411848'                                                                          | 0.999 | 0.038 | 5 |
| 30847 | '146411847'      | GI:146411847'                                                                          | 0.999 | 0.038 | 5 |
| 30848 | '146411846'      | GI:146411846'                                                                          | 0.999 | 0.038 | 5 |
| 30849 | '146411845'      | GI:146411845'                                                                          | 0.999 | 0.038 | 5 |
| 30850 | '146411844'      | GI:146411844'                                                                          | 0.999 | 0.038 | 5 |
| 30851 | '146411843'      | transcriptional regulator, winged helix-turn-helix motif'                              | 0.999 | 0.038 | 5 |
| 30853 | 146411841'       | 'GI:146411841'                                                                         | 0.999 | 0.038 | 5 |
| 30854 | 146411839'       | 'GI:146411839'                                                                         | 0.999 | 0.038 | 5 |
| 30855 | 146411838'       | 'GI:146411838'                                                                         | 0.999 | 0.038 | 5 |
| 30856 | 146411837'       | 'GI:146411837'                                                                         | 0.999 | 0.038 | 5 |
| 30858 | 146411834'       | 'GI:146411834'                                                                         | 0.999 | 0.038 | 5 |
| 30861 | 146411829'       | 'GI:146411829'                                                                         | 0.999 | 0.038 | 5 |
| 30862 | 146411828'       | 'GI:146411828'                                                                         | 0.999 | 0.038 | 5 |
| 30864 | 146411826'       | transcriptional regulator, RHH' HHpred hit (range 1..44) to 2cpg and pfam12651, P=95,3 | 0.999 | 0.038 | 5 |
| 30865 | 146411825'       | GI:146411825'                                                                          | 0.999 | 0.038 | 5 |
| 30867 | 146411823'       | 'GI:146411823'                                                                         | 0.999 | 0.038 | 5 |
| 30870 | 146411820'       | 'GI:146411820'                                                                         | 0.999 | 0.038 | 5 |
| 311   | NP_049763.1      | Baseplate spike (PAAR domain)                                                          | 0.999 | 0.037 | 2 |
| 3392  | 'AEA86265.1'     | 'hypothetical protein'                                                                 | 0.999 | 0.037 | 2 |
| 9354  | 'YP_418121.1'    | 'hypothetical protein'                                                                 | 0.999 | 0.037 | 2 |
| 11219 | 'YP_002898962.1' | 'hypothetical protein'                                                                 | 0.999 | 0.037 | 2 |
| 20792 | 'YP_717710.1'    | gp43, range: 1..122 HHsearch against CDD matches: (unmatched)'                         | 0.999 | 0.037 | 2 |
| 34618 | 'NP_542506.1'    | 'GI:18138408'                                                                          | 0.999 | 0.037 | 2 |
| 34632 | 'NP_542523.1'    | 'GI:18138422'                                                                          | 0.999 | 0.037 | 2 |
| 34635 | 'NP_542527.1'    | 'GI:18138426'                                                                          | 0.999 | 0.037 | 2 |
| 34636 | 'NP_542528.1'    | 'GI:18138427'                                                                          | 0.999 | 0.037 | 2 |
| 34638 | 'NP_542531.1'    | 'GI:18138429'                                                                          | 0.999 | 0.037 | 2 |
| 34641 | 'NP_542534.1'    | 'GI:18138432'                                                                          | 0.999 | 0.037 | 2 |
| 34643 | 'NP_542536.1'    | 'GI:18138434'                                                                          | 0.999 | 0.037 | 2 |
| 34644 | 'NP_542539.1'    | 'GI:18138437'                                                                          | 0.999 | 0.037 | 2 |
| 34645 | 'NP_542540.1'    | 'GI:18138438'                                                                          | 0.999 | 0.037 | 2 |
| 34648 | 'NP_542544.1'    | 'GI:18138442'                                                                          | 0.999 | 0.037 | 2 |
| 34666 | 'NP_542575.1'    | 'GI:18138471'                                                                          | 0.999 | 0.037 | 2 |
| 34667 | 'NP_542576.1'    | 'GI:18138472'                                                                          | 0.999 | 0.037 | 2 |
| 34668 | 'NP_542579.1'    | 'GI:18138475'                                                                          | 0.999 | 0.037 | 2 |

Core gene in the greater dsDNA virus network  
Core gene in the greater dsDNA virus network

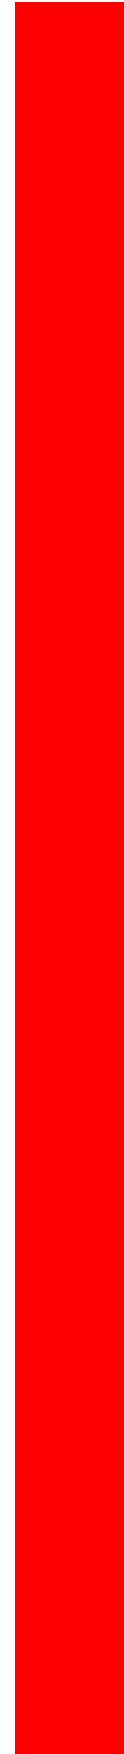

|       |                  |                                                                          |       |       |    |
|-------|------------------|--------------------------------------------------------------------------|-------|-------|----|
| 34670 | 'NP_542582.1'    | 'GI:18138478'                                                            | 0.999 | 0.037 | 2  |
| 34671 | 'NP_542583.1'    | 'GI:18138479'                                                            | 0.999 | 0.037 | 2  |
| 34672 | 'NP_542584.1'    | 'GI:18138480'                                                            | 0.999 | 0.037 | 2  |
| 34673 | 'NP_542585.1'    | 'GI:18138481'                                                            | 0.999 | 0.037 | 2  |
| 34674 | 'NP_542586.1'    | 'GI:18138482'                                                            | 0.999 | 0.037 | 2  |
| 34676 | 'NP_542588.1'    | 'GI:18138484'                                                            | 0.999 | 0.037 | 2  |
| 34678 | 'NP_542590.1'    | 'GI:18138486'                                                            | 0.999 | 0.037 | 2  |
| 34679 | 'NP_542591.1'    | 'GI:18138487'                                                            | 0.999 | 0.037 | 2  |
| 34680 | 'NP_542592.1'    | 'GI:18138488'                                                            | 0.999 | 0.037 | 2  |
| 34681 | 'NP_542593.1'    | 'GI:18138489'                                                            | 0.999 | 0.037 | 2  |
| 34686 | 'NP_542605.1'    | 'GI:18138501'                                                            | 0.999 | 0.037 | 2  |
| 36709 | 'NP_542598.1'    | uncharacterized protein                                                  | 0.999 | 0.037 | 2  |
| 30591 | '700075128'      | 'hypothetical protein [Stygiolobus rod-shaped virus]'                    | 0.999 | 0.036 | 4  |
| 30594 | '700075126'      | 'hypothetical protein [Stygiolobus rod-shaped virus]'                    | 0.999 | 0.036 | 4  |
| 30600 | '700075122'      | 'hypothetical protein [Stygiolobus rod-shaped virus]'                    | 0.999 | 0.036 | 4  |
| 30610 | '700075129'      | 'hypothetical protein [Stygiolobus rod-shaped virus]'                    | 0.999 | 0.036 | 4  |
| 30624 | '700075127'      | 'hypothetical protein [Stygiolobus rod-shaped virus]'                    | 0.999 | 0.036 | 4  |
| 30668 | '700075121'      | 'hypothetical protein [Stygiolobus rod-shaped virus]'                    | 0.999 | 0.036 | 4  |
| 30675 | '700075104'      | 'hypothetical protein [Stygiolobus rod-shaped virus]'                    | 0.999 | 0.036 | 4  |
| 30679 | '700075120'      | 'hypothetical protein [Stygiolobus rod-shaped virus]'                    | 0.999 | 0.036 | 4  |
| 30737 | '700075125'      | 'hypothetical protein [Stygiolobus rod-shaped virus]'                    | 0.999 | 0.036 | 4  |
| 30659 | '295441845'      | 'GI:295441845'                                                           | 0.999 | 0.035 | 6  |
| 30582 | '171473676'      | 'hypothetical protein AFV9_gp28 [Acidianus filamentous virus 9]'         | 0.543 | 0.035 | 4  |
| 30611 | '171473718'      | 'hypothetical protein AFV9_gp70 [Acidianus filamentous virus 9]'         | 0.543 | 0.035 | 4  |
| 30614 | '171473662'      | 'hypothetical protein AFV9_gp14 [Acidianus filamentous virus 9]'         | 0.543 | 0.035 | 4  |
| 30620 | '171473663'      | 'hypothetical protein AFV9_gp15 [Acidianus filamentous virus 9]'         | 0.543 | 0.035 | 4  |
| 30629 | '171473654'      | 'hypothetical protein AFV9_gp06 [Acidianus filamentous virus 9]'         | 0.543 | 0.035 | 4  |
| 30630 | '171473677'      | 'hypothetical protein AFV9_gp29 [Acidianus filamentous virus 9]'         | 0.543 | 0.035 | 4  |
| 30633 | '171473679'      | 'hypothetical protein AFV9_gp31 [Acidianus filamentous virus 9]'         | 0.543 | 0.035 | 4  |
| 30636 | '171473685'      | 'viral structural protein [Acidianus filamentous virus 9]'               | 0.543 | 0.035 | 4  |
| 30639 | '171473655'      | 'putative RHH transcriptional regulator [Acidianus filamentous virus 9]' | 0.543 | 0.035 | 4  |
| 30640 | '171473712'      | 'viral structural protein [Acidianus filamentous virus 9]'               | 0.543 | 0.035 | 4  |
| 30643 | '171473659'      | 'hypothetical protein AFV9_gp11 [Acidianus filamentous virus 9]'         | 0.543 | 0.035 | 4  |
| 30646 | '171473660'      | 'viral structural protein [Acidianus filamentous virus 9]'               | 0.543 | 0.035 | 4  |
| 30662 | '171473678'      | 'hypothetical protein AFV9_gp30 [Acidianus filamentous virus 9]'         | 0.543 | 0.035 | 4  |
| 30664 | '171473682'      | 'hypothetical protein AFV9_gp34 [Acidianus filamentous virus 9]'         | 0.543 | 0.035 | 4  |
| 30673 | '171473672'      | 'hypothetical protein AFV9_gp24 [Acidianus filamentous virus 9]'         | 0.543 | 0.035 | 4  |
| 30682 | '171473675'      | 'hypothetical protein AFV9_gp27 [Acidianus filamentous virus 9]'         | 0.543 | 0.035 | 4  |
| 30703 | '171473683'      | 'hypothetical protein AFV9_gp35 [Acidianus filamentous virus 9]'         | 0.543 | 0.035 | 4  |
| 21237 | 'YP_001429789.1' | 'putative metalloprotein chaperonin subunit'                             | 0.740 | 0.035 | 9  |
| 30900 | '75750439'       | 'GI:75750439'                                                            | 0.740 | 0.035 | 9  |
| 30921 | '75750404'       | 'GI:75750404'                                                            | 0.740 | 0.035 | 9  |
| 2418  | 'YP_112490.1'    | 'terminase small subunit'                                                | 0.999 | 0.033 | 3  |
| 31180 | '90403540'       | 'GI:90403540'                                                            | 0.491 | 0.033 | 10 |

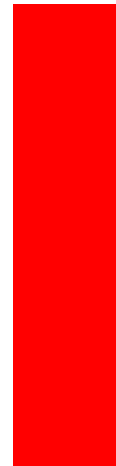

|       |                  |                                                                                   |       |       |   |
|-------|------------------|-----------------------------------------------------------------------------------|-------|-------|---|
| 34933 | 'YP_008058387.1' | 'GI:509139494'<br>'putative capsid protein VP18 [Haloarcula hispanica virus PH1]' | 0.999 | 0.033 | 3 |
| 34303 | '478755997'      | 'hypothetical protein HhPH1_gp47 [Haloarcula hispanica virus PH1]'                | 0.999 | 0.033 | 6 |
| 34304 | '478755995'      | 'hypothetical protein HhPH1_gp43 [Haloarcula hispanica virus PH1]'                | 0.999 | 0.033 | 6 |
| 34306 | '478755991'      | 'hypothetical protein HhPH1_gp40 [Haloarcula hispanica virus PH1]'                | 0.999 | 0.033 | 6 |
| 34308 | '478755988'      | 'hypothetical protein HhPH1_gp38 [Haloarcula hispanica virus PH1]'                | 0.999 | 0.033 | 6 |
| 34310 | '478755986'      | 'hypothetical protein HhPH1_gp37 [Haloarcula hispanica virus PH1]'                | 0.999 | 0.033 | 6 |
| 34311 | '478755985'      | 'hypothetical protein HhPH1_gp36 [Haloarcula hispanica virus PH1]'                | 0.999 | 0.033 | 6 |
| 34312 | '478755984'      | 'hypothetical protein HhPH1_gp35 [Haloarcula hispanica virus PH1]'                | 0.999 | 0.033 | 6 |
| 34313 | '478755983'      | 'hypothetical protein HhPH1_gp30 [Haloarcula hispanica virus PH1]'                | 0.999 | 0.033 | 6 |
| 34316 | '478755978'      | 'capsid protein VP10 [Haloarcula hispanica virus PH1]'                            | 0.999 | 0.033 | 6 |
| 34320 | '478755974'      | 'capsid protein VP5 [Haloarcula hispanica virus PH1]'                             | 0.999 | 0.033 | 6 |
| 34321 | '478755973'      | 'capsid protein VP13 [Haloarcula hispanica virus PH1]'                            | 0.999 | 0.033 | 6 |
| 34322 | '478755971'      | 'hypothetical protein HhPH1_gp22 [Haloarcula hispanica virus PH1]'                | 0.999 | 0.033 | 6 |
| 34323 | '478755970'      | 'capsid protein VP12 [Haloarcula hispanica virus PH1]'                            | 0.999 | 0.033 | 6 |
| 34326 | '478755967'      | 'hypothetical protein HhPH1_gp18 [Haloarcula hispanica virus PH1]'                | 0.999 | 0.033 | 6 |
| 34327 | '478755966'      | 'hypothetical protein HhPH1_gp17 [Haloarcula hispanica virus PH1]'                | 0.999 | 0.033 | 6 |
| 34328 | '478755965'      | 'hypothetical protein HhPH1_gp16 [Haloarcula hispanica virus PH1]'                | 0.999 | 0.033 | 6 |
| 34329 | '478755964'      | 'hypothetical protein HhPH1_gp15 [Haloarcula hispanica virus PH1]'                | 0.999 | 0.033 | 6 |
| 34330 | '478755963'      | 'hypothetical protein HhPH1_gp14 [Haloarcula hispanica virus PH1]'                | 0.999 | 0.033 | 6 |
| 34331 | '478755962'      | 'capsid protein VP1 [Haloarcula hispanica virus PH1]'                             | 0.999 | 0.033 | 6 |
| 34332 | '478755960'      | 'hypothetical protein HhPH1_gp05 [Haloarcula hispanica virus PH1]'                | 0.999 | 0.033 | 6 |
| 34334 | '478755953'      | 'hypothetical protein HhPH1_gp03 [Haloarcula hispanica virus PH1]'                | 0.999 | 0.033 | 6 |
| 34336 | '478755951'      | 'putative glycosyltransferase [Megavirus lba]'                                    | 0.537 | 0.029 | 9 |
| 357   | '448825509'      | 'GI:448260209'                                                                    | 0.537 | 0.029 | 9 |
| 30652 | '448260209'      | 'GI:448260215'                                                                    | 0.537 | 0.029 | 9 |
| 30676 | '448260215'      | 'GI:448260182'                                                                    | 0.537 | 0.029 | 9 |
| 30705 | '448260182'      | 'GI:448260180'                                                                    | 0.537 | 0.029 | 9 |
| 30723 | '448260180'      | 'GI:448260189'                                                                    | 0.537 | 0.029 | 9 |
| 30739 | '448260189'      | 'GI:448260198'                                                                    | 0.537 | 0.029 | 9 |
| 30747 | '448260198'      | 'GI:448260191'                                                                    | 0.537 | 0.029 | 9 |
| 30787 | '448260191'      | 'GI:448260194'                                                                    | 0.537 | 0.029 | 9 |
| 30878 | '448260194'      | 'GI:448260193'                                                                    | 0.537 | 0.029 | 9 |
| 30879 | '448260193'      | 'GI:448260192'                                                                    | 0.537 | 0.029 | 9 |
| 30880 | '448260192'      | 'putative HNH-family endonuclease [Melbournevirus]'                               | 0.999 | 0.029 | 1 |
| 43    | '701447394'      | 'alt RNA polymerase ADP-ribosylase'                                               | 0.999 | 0.029 | 1 |
| 257   | 'BAI83209.1'     | 'belonging to T4-LIKE GC: 843'                                                    | 0.999 | 0.029 | 1 |
| 590   | 'YP_195178.1'    | GTP cyclohydrolase                                                                | 0.999 | 0.029 | 1 |
| 1582  | '531034917'      | Organic radical activating enzyme (radical SAM superfamily)                       | 0.999 | 0.029 | 1 |
| 1841  | YP_007378978.1'  | 'hypothetical protein, range: 1..185 HHsearch against CDD matches: (unmatched)'   | 0.999 | 0.029 | 1 |
| 1963  | 'ADF58194.1'     | 6-pyruvoyl tetrahydropterin synthase                                              | 0.999 | 0.029 | 1 |
| 6195  | YP_007378981.1'  | 7-cyano-7-deazaguanine reductase                                                  | 0.999 | 0.029 | 1 |
| 9116  | 'NP_899371.1'    | 'putative cobalamin biosynthesis protein CobT'                                    | 0.999 | 0.029 | 1 |
| 11110 | 'ADX87791.1'     | 'gp666'                                                                           | 0.999 | 0.029 | 1 |
| 19073 | 'AEO93909.1'     |                                                                                   |       |       |   |

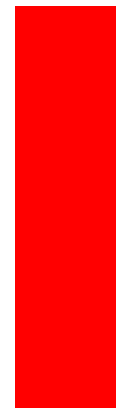



|       |                  |                                                                               |       |       |   |
|-------|------------------|-------------------------------------------------------------------------------|-------|-------|---|
| 21221 | 'YP_001429772.1' | 'hypothetical protein'                                                        | 0.999 | 0.029 | 1 |
| 24683 | 'AEL97961.1'     | 'gp52'                                                                        | 0.999 | 0.029 | 1 |
| 27604 | 'YP_003084174.1' | 'minor head protein, range: 1..151 HHsearch against CDD matches: (unmatched)' | 0.999 | 0.029 | 1 |
| 34764 | 'YP_007378914.1' | 'GI:443404577'                                                                | 0.999 | 0.029 | 1 |
| 34766 | 'YP_007378918.1' | 'GI:443404580'                                                                | 0.999 | 0.029 | 1 |
| 34767 | 'YP_007378919.1' | 'GI:443404581'                                                                | 0.999 | 0.029 | 1 |
| 34768 | 'YP_007378922.1' | 'GI:443404583'                                                                | 0.999 | 0.029 | 1 |
| 34769 | 'YP_007378923.1' | 'GI:443404584'                                                                | 0.999 | 0.029 | 1 |
| 34770 | 'YP_007378925.1' | 'GI:443404586'                                                                | 0.999 | 0.029 | 1 |
| 34771 | 'YP_007378926.1' | 'GI:443404587'                                                                | 0.999 | 0.029 | 1 |
| 34774 | 'YP_007378933.1' | 'GI:443404594'                                                                | 0.999 | 0.029 | 1 |
| 34775 | 'YP_007378935.1' | 'GI:443404596'                                                                | 0.999 | 0.029 | 1 |
| 34776 | 'YP_007378938.1' | 'GI:443404599'                                                                | 0.999 | 0.029 | 1 |
| 34778 | 'YP_007378945.1' | 'GI:443404606'                                                                | 0.999 | 0.029 | 1 |
| 34779 | 'YP_007378946.1' | 'GI:443404607'                                                                | 0.999 | 0.029 | 1 |
| 34782 | 'YP_007378955.1' | 'GI:443404616'                                                                | 0.999 | 0.029 | 1 |
| 34783 | 'YP_007378956.1' | 'GI:443404617'                                                                | 0.999 | 0.029 | 1 |
| 34784 | 'YP_007378958.1' | 'GI:443404619'                                                                | 0.999 | 0.029 | 1 |
| 34785 | 'YP_007378960.1' | 'GI:443404621'                                                                | 0.999 | 0.029 | 1 |
| 34787 | 'YP_007378965.1' | 'GI:443404626'                                                                | 0.999 | 0.029 | 1 |
| 34788 | 'YP_007378966.1' | 'GI:443404627'                                                                | 0.999 | 0.029 | 1 |
| 34789 | 'YP_007378969.1' | 'GI:443404630'                                                                | 0.999 | 0.029 | 1 |
| 34793 | 'YP_007378974.1' | 'GI:443404635'                                                                | 0.999 | 0.029 | 1 |
| 34794 | 'YP_007378976.1' | 'GI:443404637'                                                                | 0.999 | 0.029 | 1 |
| 34795 | 'YP_007378977.1' | 'GI:443404638'                                                                | 0.999 | 0.029 | 1 |
| 34796 | 'YP_007378984.1' | 'GI:443404645'                                                                | 0.999 | 0.029 | 1 |
| 34803 | 'YP_007378995.1' | 'GI:443404656'                                                                | 0.999 | 0.029 | 1 |
| 34804 | 'YP_007378999.1' | 'GI:443404660'                                                                | 0.999 | 0.029 | 1 |
| 34807 | 'YP_007379004.1' | 'GI:443404665'                                                                | 0.999 | 0.029 | 1 |
| 34808 | 'YP_007379006.1' | 'GI:443404667'                                                                | 0.999 | 0.029 | 1 |
| 34809 | 'YP_007379007.1' | 'GI:443404668'                                                                | 0.999 | 0.029 | 1 |
| 34811 | 'YP_007379009.1' | 'GI:443404670'                                                                | 0.999 | 0.029 | 1 |
| 34812 | 'YP_007379013.1' | 'GI:443404674'                                                                | 0.999 | 0.029 | 1 |
| 34817 | 'YP_007379026.1' | 'GI:443404687'                                                                | 0.999 | 0.029 | 1 |
| 34818 | 'YP_007379027.1' | 'GI:443404688'                                                                | 0.999 | 0.029 | 1 |
| 34819 | 'YP_007379028.1' | 'GI:443404689'                                                                | 0.999 | 0.029 | 1 |
| 34820 | 'YP_007379029.1' | 'GI:443404690'                                                                | 0.999 | 0.029 | 1 |
| 34833 | 'YP_007379049.1' | 'GI:443404710'                                                                | 0.999 | 0.029 | 1 |
| 34835 | 'YP_007379054.1' | 'GI:443404715'                                                                | 0.999 | 0.029 | 1 |
| 34842 | 'YP_007379061.1' | 'GI:443404722'                                                                | 0.999 | 0.029 | 1 |
| 34845 | 'YP_007379065.1' | 'GI:443404726'                                                                | 0.999 | 0.029 | 1 |
| 34846 | 'YP_007379067.1' | 'GI:443404728'                                                                | 0.999 | 0.029 | 1 |
| 34847 | 'YP_007379068.1' | 'GI:443404729'                                                                | 0.999 | 0.029 | 1 |
| 34848 | 'YP_007379069.1' | 'GI:443404730'                                                                | 0.999 | 0.029 | 1 |
| 34850 | 'YP_007379073.1' | 'GI:443404734'                                                                | 0.999 | 0.029 | 1 |
| 35104 | 'YP_007378980.1' | 'GI:443404641'                                                                | 0.999 | 0.029 | 1 |
| 36710 | YP_007379010'    | RadA recombinase                                                              | 0.999 | 0.029 | 1 |
| 30    | '134287277'      | 'UvrD-like helicase'                                                          | 0.999 | 0.026 | 7 |

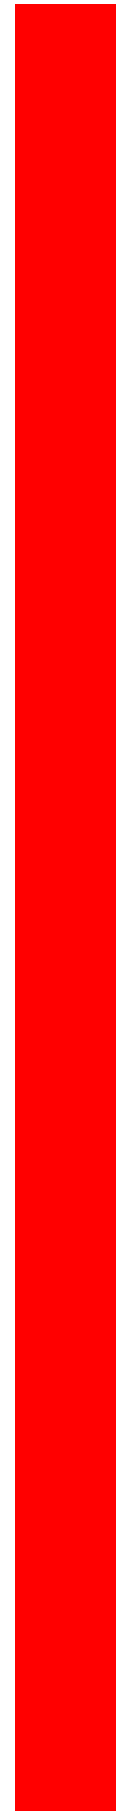

|       |                  |                                                                                   |       |        |   |
|-------|------------------|-----------------------------------------------------------------------------------|-------|--------|---|
| 35184 | 'YP_007195317.1' | 'GI:430721640'                                                                    | 0.999 | 0.026  | 7 |
| 36712 | YP_007195312.1   | transcriptional regulation (plasmid)                                              | 0.999 | 0.026  | 7 |
| 34501 | 'WP_016939979.1' | 'GI:515506725'                                                                    | 0.999 | 0.024  | 5 |
| 34502 | 'WP_016939980.1' | 'GI:515506726'                                                                    | 0.999 | 0.024  | 5 |
| 34503 | 'WP_016939981.1' | 'GI:515506727'                                                                    | 0.999 | 0.024  | 5 |
| 34505 | 'WP_016939987.1' | 'GI:515506733'                                                                    | 0.999 | 0.024  | 5 |
| 36711 | NP_776202.1'     | RepA                                                                              | 0.12  | 0.0233 | 6 |
| 84    | 'ACU41204.1'     | 'gp58, range: 1..64 HHsearch against CDD matches: pfam00057:Ldl_recept_a Low-den' | 0.024 | 0.021  | 2 |

Shared by SNJ1, pZMX101 and pC2A  
Core gene in the greater dsDNA virus network
